# Supplementary material for: Effects of Housing First on Employment and Income of Homeless Individuals: Results of a Randomized Trial
Source: Atypon-hosted journal article supplement (doi:10.1176/appi.ps.201500002), 2016-02-14

Effect of HF on employment

Online supplement Table 1. Variables associated with competitive employment, participants employed at baseline removed.

|                                                | High Needs (n=837) |       |      |       | Moderate needs (n=1078) |       |      |       |
|------------------------------------------------|--------------------|-------|------|-------|-------------------------|-------|------|-------|
|                                                | OR                 | 95%CI |      | p     | OR                      | 95%CI |      | p     |
| <b>HF (Unadjusted)</b>                         | .73                | .55   | 1.14 | .060  | .70                     | .49   | .96  | .039  |
| <b>HF (Adjusted)</b>                           | .50                | .24   | 1.02 | .056  | .36                     | .18   | .70  | .003  |
| <b>Time</b>                                    | 1.08               | 1.06  | 1.11 | <.001 | 1.06                    | 1.03  | 1.08 | <.001 |
| <b>HF x time interaction</b>                   | 1.02               | .98   | 1.05 | .392  | 1.05                    | 1.01  | 1.08 | .007  |
| <b>Site, compared to Montreal</b>              |                    |       |      |       |                         |       |      |       |
| <b>Vancouver</b>                               | 2.60               | 1.42  | 4.78 | .002  | .74                     | .48   | 1.15 | .185  |
| <b>Winnipeg</b>                                | .78                | .36   | 1.69 | .530  | .50                     | .32   | .79  | .003  |
| <b>Toronto</b>                                 | .65                | .31   | 1.35 | .244  | .35                     | .23   | .55  | <.001 |
| <b>Moncton <sup>a</sup></b>                    | 2.97               | 1.58  | 5.56 | .001  |                         |       |      |       |
| <b>Male</b>                                    | 1.59               | 1.06  | 2.37 | .024  | 1.63                    | 1.13  | 2.34 | .008  |
| <b>More than 12 years of education</b>         | 1.37               | .98   | 1.91 | .064  | 1.59                    | 1.15  | 2.19 | .005  |
| <b>Age</b>                                     | .96                | .94   | .97  | <.001 | .97                     | .95   | .99  | <.001 |
| <b>Psychotic disorder</b>                      | .70                | .47   | 1.06 | .091  | .76                     | .53   | 1.10 | .143  |
| <b>Alcohol disorder at baseline</b>            | 1.61               | 1.14  | 2.28 | .007  | 1.26                    | .89   | 1.78 | .197  |
| <b>Substance disorder at baseline</b>          | .63                | .44   | .90  | .010  | .83                     | .58   | 1.19 | .311  |
| <b>MCAS</b>                                    | 1.00               | .97   | 1.02 | .859  | 1.04                    | 1.01  | 1.06 | .009  |
| <b>Month of the data- collection interview</b> | 1.72               | 1.59  | 1.86 | <.001 | 1.70                    | 1.57  | 1.85 | <.001 |

<sup>a</sup>No participant at the Moncton site was classified as Moderate Need; RSE robust standard errors; MCAS Multnomah Community Ability Scale.

Effect of HF on employment

Online supplement Table 2. Negative binomial regression of hours worked per week in competitive employment.

|                                           | ACT (n=856) |        |       |          | ICM (n=1103) |        |      |          |
|-------------------------------------------|-------------|--------|-------|----------|--------------|--------|------|----------|
|                                           | Coef.       | 95% CI |       | <i>p</i> | Coef.        | 95% CI |      | <i>p</i> |
| <b>Unadjusted HF</b>                      | 1.11        | -2.48  | 4.71  | 0.543    | -2.63        | -5.11  | -.14 | .038     |
| <b>Adjusted HF</b>                        | 1.33        | -2.38  | 5.04  | .482     | -2.19        | -4.73  | .36  | .092     |
| <b>Site, compared to Montreal</b>         |             |        |       |          |              |        |      |          |
| <b>Vancouver</b>                          | 1.22        | -4.23  | 6.67  | .661     | -3.74        | -7.85  | .38  | .075     |
| <b>Toronto</b>                            | 10.75       | 4.05   | 17.45 | .002     | 4.20         | .62    | 7.79 | .022     |
| <b>Winnipeg</b>                           | 4.14        | -2.43  | 10.71 | .217     | -1.90        | -5.20  | 1.40 | .259     |
| <b>Moncton</b>                            | 5.95        | -.40   | 12.29 | .066     |              |        |      |          |
| <b>Male</b>                               | -1.30       | -5.82  | 3.21  | .572     | 1.85         | -1.16  | 4.86 | .228     |
| <b>Education (12y+)</b>                   | -.60        | -4.90  | 3.70  | .783     | 1.46         | -1.27  | 4.20 | .295     |
| <b>Age</b>                                | -.18        | -.36   | .00   | .055     | -.17         | -.29   | -.05 | .006     |
| <b>Employed at baseline</b>               | 4.33        | -5.55  | 14.20 | .391     | 1.66         | -1.97  | 5.29 | .370     |
| <b>Psychotic disorder</b>                 | 1.11        | -2.63  | 4.84  | .561     | -.49         | -3.60  | 2.61 | .755     |
| <b>Alcohol disorder at baseline</b>       | 4.01        | .43    | 7.58  | .028     | 1.31         | -1.48  | 4.10 | .356     |
| <b>Substance use disorder at baseline</b> | -4.03       | -7.73  | -.33  | .033     | .08          | -2.54  | 2.71 | .950     |
| <b>MCAS score at baseline</b>             | -.13        | -.44   | .18   | .427     | .09          | -.13   | .31  | .420     |

Effect of HF on employment

Online supplement Table 3. Total income regression model estimated via GEE.

|                                     | ACT (n=856)   |         |         |          | ICM (n=1103)  |         |         |          |
|-------------------------------------|---------------|---------|---------|----------|---------------|---------|---------|----------|
|                                     | Marginal Mean | 95% CI  |         | <i>p</i> | Marginal Mean | 95% CI  |         | <i>p</i> |
| <b>Unadjusted HF</b>                | 15.76         | -29.47  | 60.99   | .495     | 9.16          | -25.68  | 44.00   | .610     |
| <b>Adjusted HF</b>                  | 34.24         | -10.24  | 78.71   | .131     | 8.19          | -26.31  | 42.69   | .642     |
| <b>Time</b>                         | 7.82          | 6.09    | 9.55    | <.001    | 7.55          | 6.04    | 9.06    | <.001    |
| <b>Site, compared to Montreal</b>   |               |         |         |          |               |         |         |          |
| <b>Moncton</b>                      | -285.54       | -226.54 | -344.53 | <.001    |               |         |         |          |
| <b>Toronto</b>                      | -76.04        | -142.01 | -10.07  | .024     | 4.98          | -43.77  | 53.73   | .841     |
| <b>Winnipeg</b>                     | -373.96       | -436.71 | -311.22 | <.001    | -260.17       | -309.58 | -210.77 | <.001    |
| <b>Vancouver</b>                    | -32.58        | -82.69  | 17.53   | .203     | 65.80         | 12.34   | 119.26  | .016     |
| <b>Male</b>                         | 44.68         | .52     | 88.84   | .047     | -.29          | -36.27  | 35.70   | .988     |
| <b>Education (12y+)</b>             | 24.69         | -21.29  | 70.67   | .293     | 41.03         | 3.71    | 78.36   | .031     |
| <b>Age</b>                          | .54           | -1.32   | 2.39    | .571     | 2.36          | .38     | 4.34    | .019     |
| <b>Psychotic disorder</b>           | -65.26        | -124.87 | -5.65   | .032     | -7.38         | -44.95  | 30.19   | .700     |
| <b>Alcohol disorder at baseline</b> | 46.98         | 2.86    | 91.10   | .037     | 17.27         | -20.49  | 55.03   | .370     |

Effect of HF on employment

Online supplement Table 4. Income from government support regression model estimated via GEE.

|                                     | ACT (n=856)   |         |         |          | ICM (n=1103)  |         |         |          |
|-------------------------------------|---------------|---------|---------|----------|---------------|---------|---------|----------|
|                                     | Marginal Mean | 95% CI  |         | <i>p</i> | Marginal Mean | 95% CI  |         | <i>p</i> |
| <b>Unadjusted HF</b>                | 28.55         | -8.40   | 65.50   | .130     | 47.69         | 14.61   | 80.77   | .005     |
| <b>Adjusted HF</b>                  | 13.97         | -18.17  | 46.10   | .394     | 27.49         | 2.67    | 57.66   | .040     |
| <b>Time</b>                         | 6.89          | 5.56    | 8.22    | <.001    | 6.39          | 5.26    | 7.52    | <.001    |
| <b>Site, compared to Montreal</b>   |               |         |         |          |               |         |         |          |
| <b>Moncton</b>                      | -255.64       | -299.41 | -211.87 | <.001    |               |         |         |          |
| <b>Toronto</b>                      | -55.75        | -104.43 | -7.08   | .025     | -28.89        | -71.96  | 14.19   | .189     |
| <b>Winnipeg</b>                     | -352.68       | -396.34 | -309.03 | <.001    | -260.35       | -304.50 | -216.20 | <.001    |
| <b>Vancouver</b>                    | -23.28        | -58.45  | 11.88   | .194     | 48.95         | .37     | 97.53   | .048     |
| <b>Male</b>                         | -13.23        | -51.04  | 24.57   | .493     | -58.86        | -91.59  | -26.14  | <.001    |
| <b>Education (12y+)</b>             | 39.38         | 5.02    | 73.73   | .025     | -5.71         | -37.65  | 26.23   | .726     |
| <b>Age</b>                          | 2.01          | .42     | 3.60    | .013     | 5.29          | 3.66    | 6.92    | <.001    |
| <b>Psychotic disorder</b>           | -24.52        | -64.76  | 15.72   | .232     | 23.91         | -9.62   | 57.44   | .162     |
| <b>Alcohol disorder at baseline</b> | 3.64          | -31.31  | 38.58   | .838     | -12.79        | -45.77  | 20.19   | .447     |

Online supplement Table 5. Income from competitive employment regression model estimated via GEE.

|                                     | ACT (n=856)   |        |       |          | ICM (n=1103)  |        |       |          |
|-------------------------------------|---------------|--------|-------|----------|---------------|--------|-------|----------|
|                                     | Marginal Mean | 95% CI |       | <i>p</i> | Marginal Mean | 95% CI |       | <i>p</i> |
| <b>Unadjusted HF</b>                | -27.39        | -49.31 | 5.47  | .140     | -31.26        | -51.53 | 10.99 | .356     |
| <b>Adjusted HF</b>                  | -8.68         | -13.76 | 3.60  | .061     | -17.90        | -58.02 | 17.15 | .288     |
| <b>Time</b>                         | 7.10          | 2.60   | 10.16 | .002     | .90           | -1.87  | 2.04  | .932     |
| <b>Site, compared to Montreal</b>   |               |        |       |          |               |        |       |          |
| <b>Moncton</b>                      | 1.72          | -3.57  | 7.02  | .523     |               |        |       |          |
| <b>Toronto</b>                      | 14.08         | 6.76   | 21.40 | <.001    | 30.62         | -18.82 | 80.06 | .225     |
| <b>Winnipeg</b>                     | 5.64          | -4.78  | 16.06 | .289     | -13.93        | -52.12 | 24.26 | .475     |
| <b>Vancouver</b>                    | 2.77          | -2.39  | 7.94  | .293     | 2.09          | -40.32 | 44.50 | .923     |
| <b>Male</b>                         | 14.19         | .78    | 27.59 | .038     | 10.87         | -12.84 | 34.58 | .369     |
| <b>Education (12y+)</b>             | 14.49         | -.62   | 29.61 | .060     | 39.89         | 13.58  | 66.21 | .003     |
| <b>Age</b>                          | -.59          | -1.44  | .26   | .177     | -2.96         | -4.54  | -1.38 | <.001    |
| <b>Psychotic disorder</b>           | -22.80        | -40.67 | -4.94 | .012     | -5.32         | -34.94 | 24.31 | .725     |
| <b>Alcohol disorder at baseline</b> | 14.19         | 1.58   | 27.35 | .028     | 19.64         | -9.79  | 49.07 | .191     |

Online supplement Table 6. Income from street activities regression model estimated via GEE.

|                                     | ACT (n=856)   |         |        |          | ICM (n=1103)  |        |        |          |
|-------------------------------------|---------------|---------|--------|----------|---------------|--------|--------|----------|
|                                     | Marginal Mean | 95% CI  |        | <i>p</i> | Marginal Mean | 95% CI |        | <i>p</i> |
| <b>Unadjusted HF</b>                | -1.19         | -22.91  | 20.53  | .914     | -9.42         | -23.08 | 4.24   | .177     |
| <b>Adjusted HF</b>                  | -.84          | -25.55  | 23.87  | .947     | -19.79        | -43.85 | 4.26   | .107     |
| <b>Time</b>                         | .31           | -.80    | 1.42   | .587     | .39           | -1.12  | .34    | .293     |
| <b>Site, compared to Montreal</b>   |               |         |        |          |               |        |        |          |
| <b>Moncton</b>                      | -71.92        | -116.05 | -27.79 | .001     |               |        |        |          |
| <b>Toronto</b>                      | -45.70        | -93.02  | 1.63   | .058     | 17.09         | -2.57  | 36.76  | .088     |
| <b>Winnipeg</b>                     | -19.23        | -74.48  | 36.02  | .495     | 27.28         | 2.34   | 52.21  | .032     |
| <b>Vancouver</b>                    | -20.33        | -68.68  | 28.03  | .410     | 70.42         | 35.24  | 105.60 | <.001    |
| <b>Male</b>                         | 59.51         | 17.08   | 101.95 | .006     | 83.36         | 41.88  | 124.85 | <.001    |
| <b>Education (12y+)</b>             | -41.02        | -76.13  | -5.91  | .022     | 14.46         | -12.54 | 41.47  | .294     |
| <b>Age</b>                          | .71           | -.45    | 1.87   | .229     | -.83          | -1.89  | .23    | .123     |
| <b>Psychotic disorder</b>           | -35.12        | -67.46  | -2.78  | .033     | -11.95        | -41.75 | 17.85  | .432     |
| <b>Alcohol disorder at baseline</b> | 11.53         | -14.01  | 37.08  | .376     | 13.29         | -9.61  | 68.30  | .284     |

Online supplement Table 7. Earning exemptions, according to Provincial Ministries responsible for social services.

| <b>Welfare earning exemption for people with disabilities *</b> |                                              |
|-----------------------------------------------------------------|----------------------------------------------|
| <b>Moncton</b>                                                  | \$500/month + 30% of every dollar beyond 500 |
| <b>Montreal</b>                                                 | \$200/ month                                 |
| <b>Toronto</b>                                                  | \$200/ month +50% of every dollar beyond 200 |
| <b>Winnipeg</b>                                                 | \$200/month + 30% of every dollar beyond 200 |
| <b>Vancouver</b>                                                | \$500/month                                  |

\* As of December 2014.

Effect of HF on employment

Figure 1. CONSORT diagram of patient flow

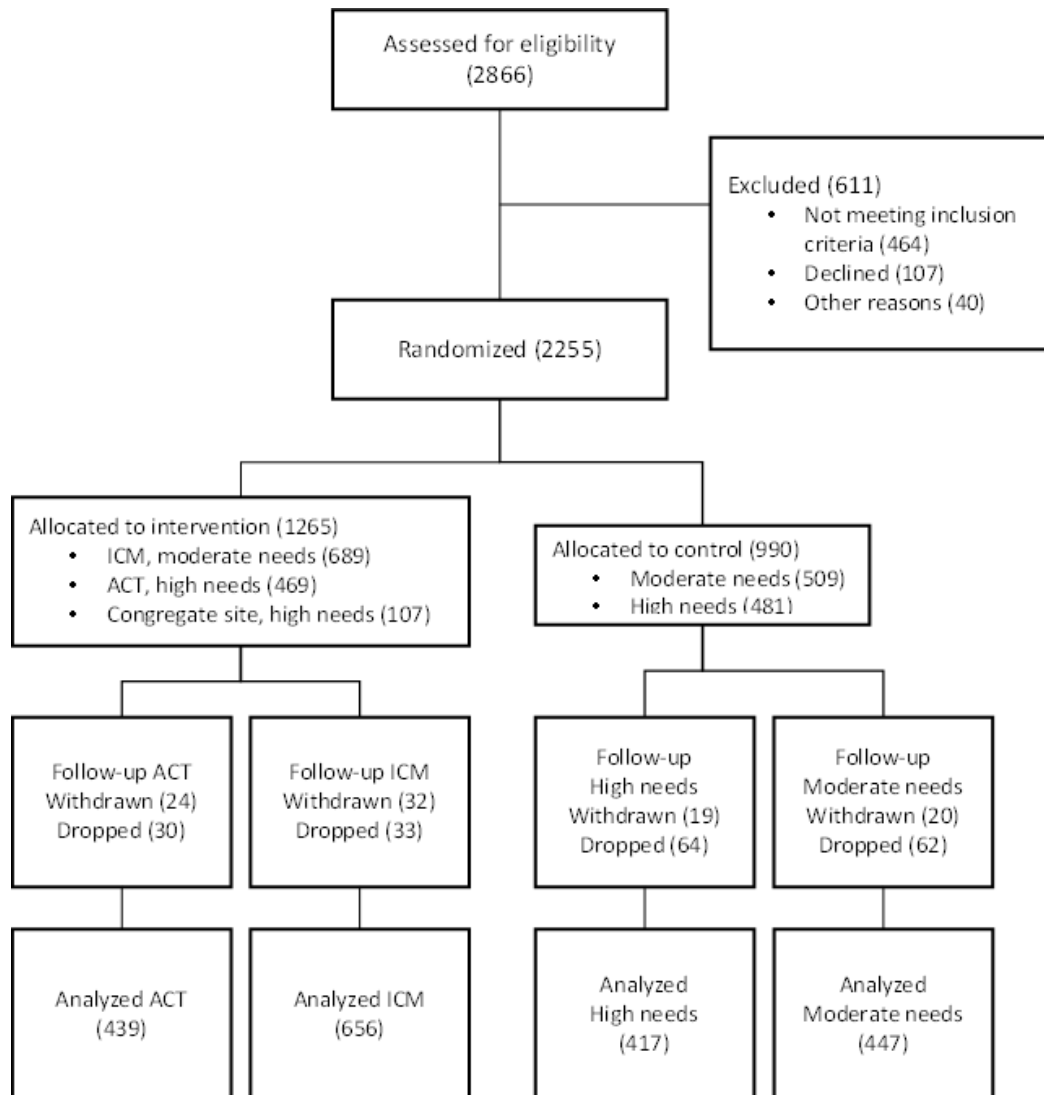

Effect of HF on employment

Figure 2 and 3. Log Odds of employment over time

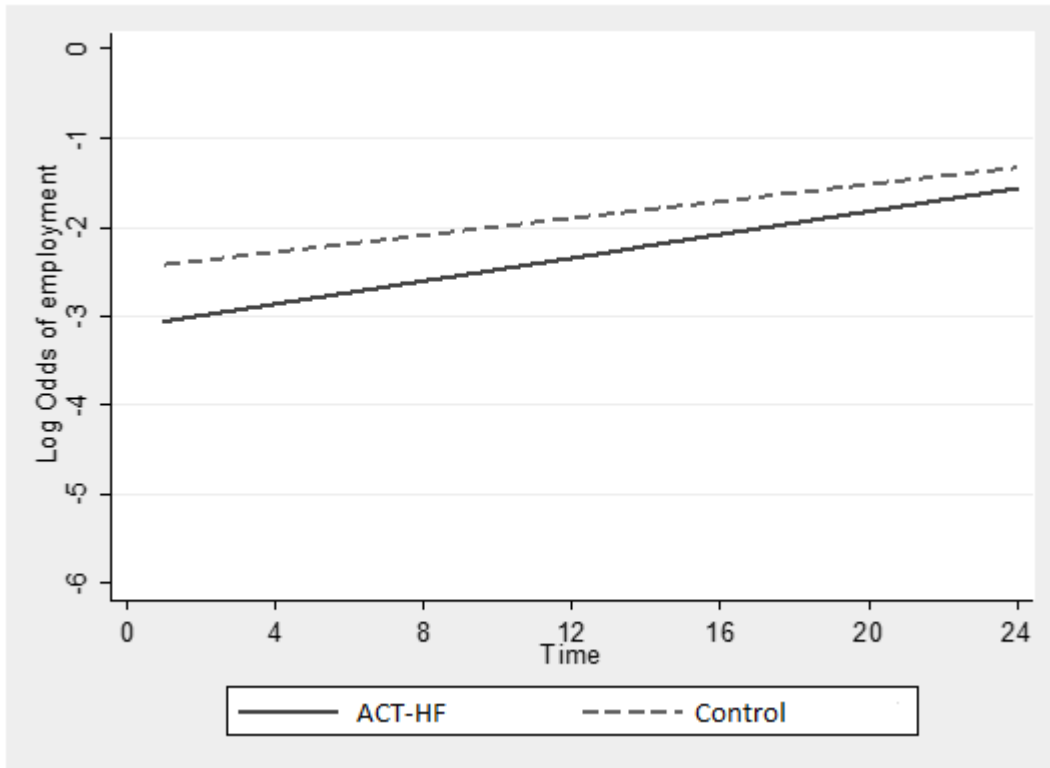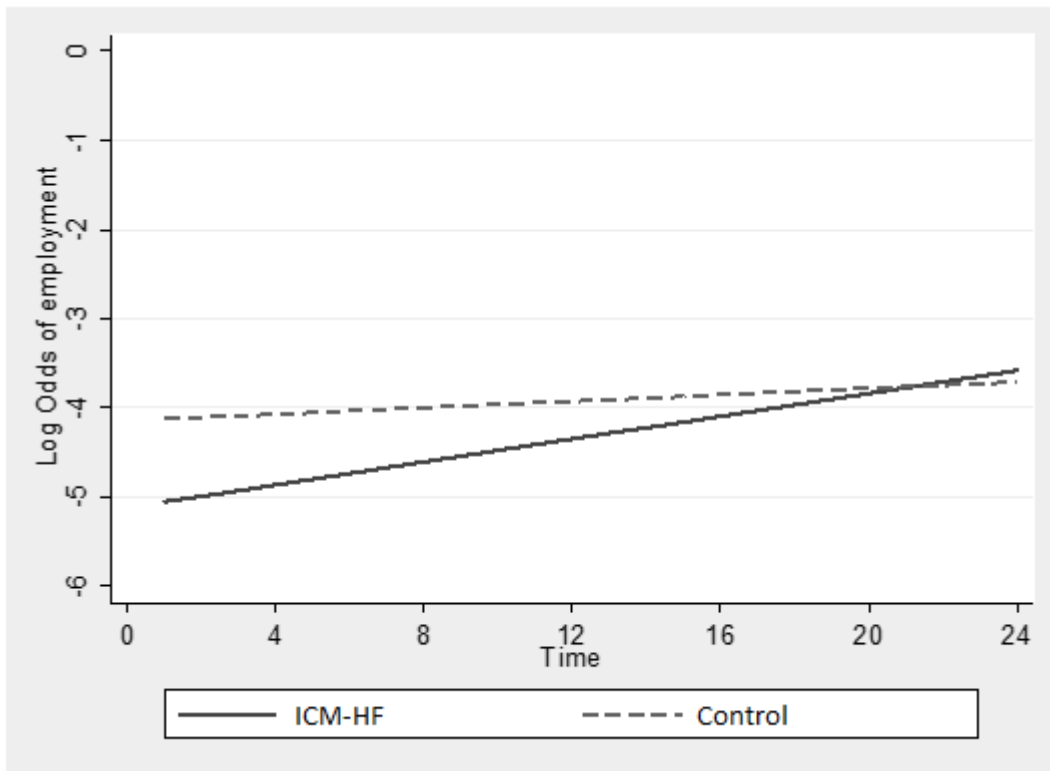

Effect of HF on employment

Figure 4 and 5. Percent of participants in competitive employment over time

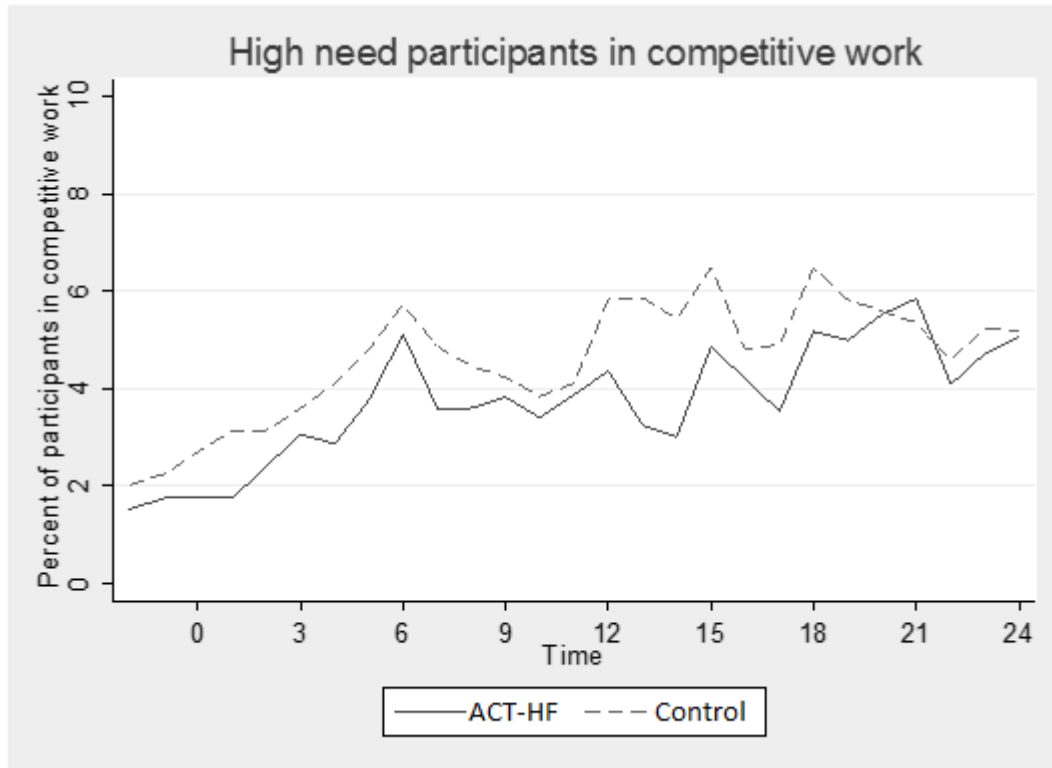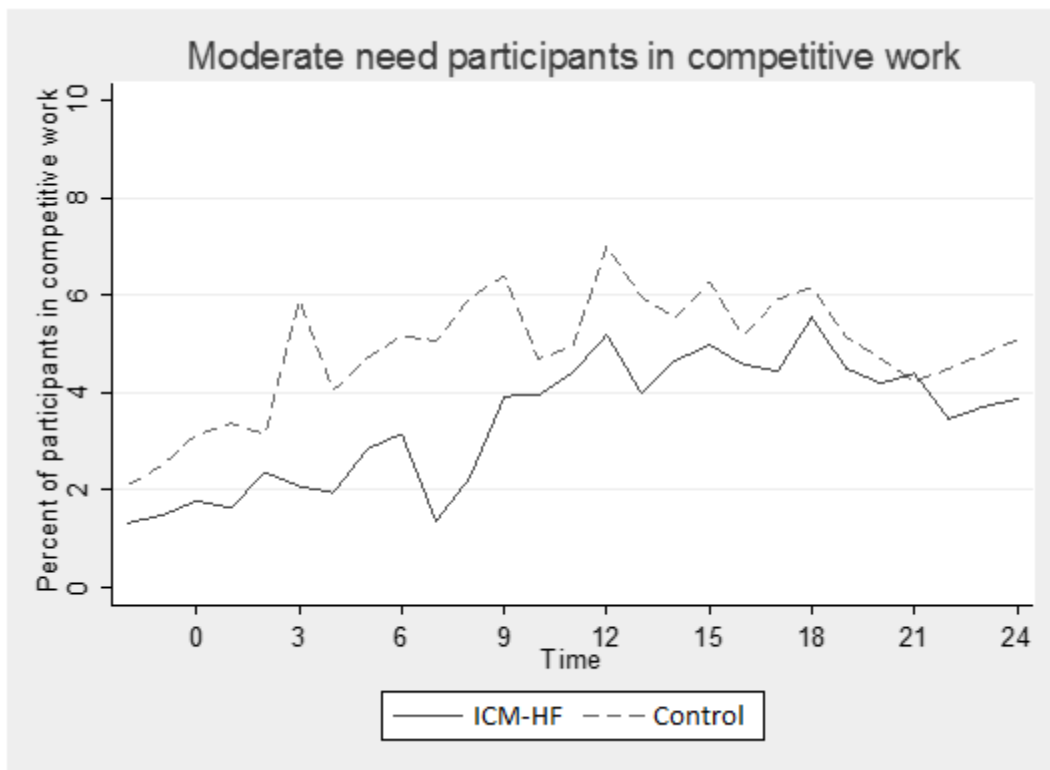

Supplement: appi.ps.201500002.ds001.pdf [file appi.ps.201500002.ds001.pdf]
